# Supplementary material for: Spindle-like MRI-active europium-doped iron oxide nanoparticles with shape-induced cytotoxicity from simple and facile ferrihydrite crystallization procedure
Source: Royal Society of Chemistry journal article supplement (doi:10.1039/c9ra10683a), 2020-01-01
Supplement: c9ra10683a1.pdf [file c9ra10683a1.pdf]

Electronic supplementary information (ESI) for

## **Spindle-like MRI-active europium-doped iron oxide nanoparticles with shape-induced cytotoxicity from simple and facile ferrihydrite crystallization procedure**

Afanasy V. Lunin,<sup>a</sup> Ilya L. Sokolov,<sup>a</sup> Ivan V. Zelepukin,<sup>a,b</sup> Ilya V. Zubarev,<sup>a</sup> Maria N. Yakovtseva,<sup>a</sup> Elizaveta N. Mochalova,<sup>a,c</sup> Julian M. Rozenberg<sup>a</sup>, Maxim P. Nikitin,<sup>a,b</sup> and Eugene L. Kolychev<sup>a,c,\*</sup>

<sup>a</sup>Moscow Institute of Physics and Technology (National Research University), 9 Institutskiy per., Dolgoprudny, Moscow Region, 141700, Russia.

<sup>b</sup>Shemyakin–Ovchinnikov Institute of Bioorganic Chemistry, Russian Academy of Sciences, Ulitsa Miklukho-Maklaya, 16/10, Moscow, 117997, Russia.

<sup>c</sup>Prokhorov General Physics Institute of the Russian Academy of Sciences, 38 Vavilov St., Moscow 119991, Russia.

E-mail: eugene.kolychev@gmail.com

$$\text{Percent of injected dose per organ [\%]} = \frac{\text{Europium organ concentration [\mu g/g]} \times \text{Organ weight [g]}}{\text{Injected europium mass [\mu g]}} \times 100 \%$$

**Formula S1.** Calculation of NPs retained by organs. Europium organ concentration and Injected europium mass were measured using ICP-MS. Organ weight was measured using precision balances.

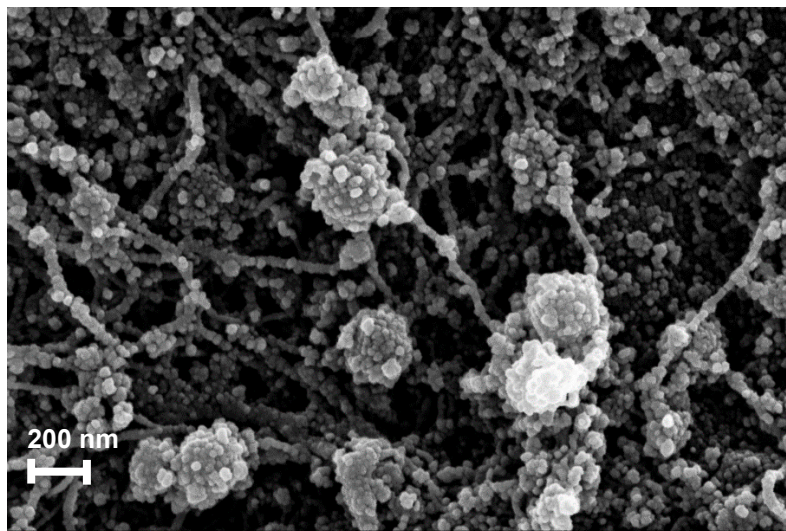

**Figure S1.** SEM of part of the cytoplasm of a CHO cell after treatment with the NPs. The cytoskeleton network and vesicles associated with microtubules are visible. The plasma membrane is destroyed.

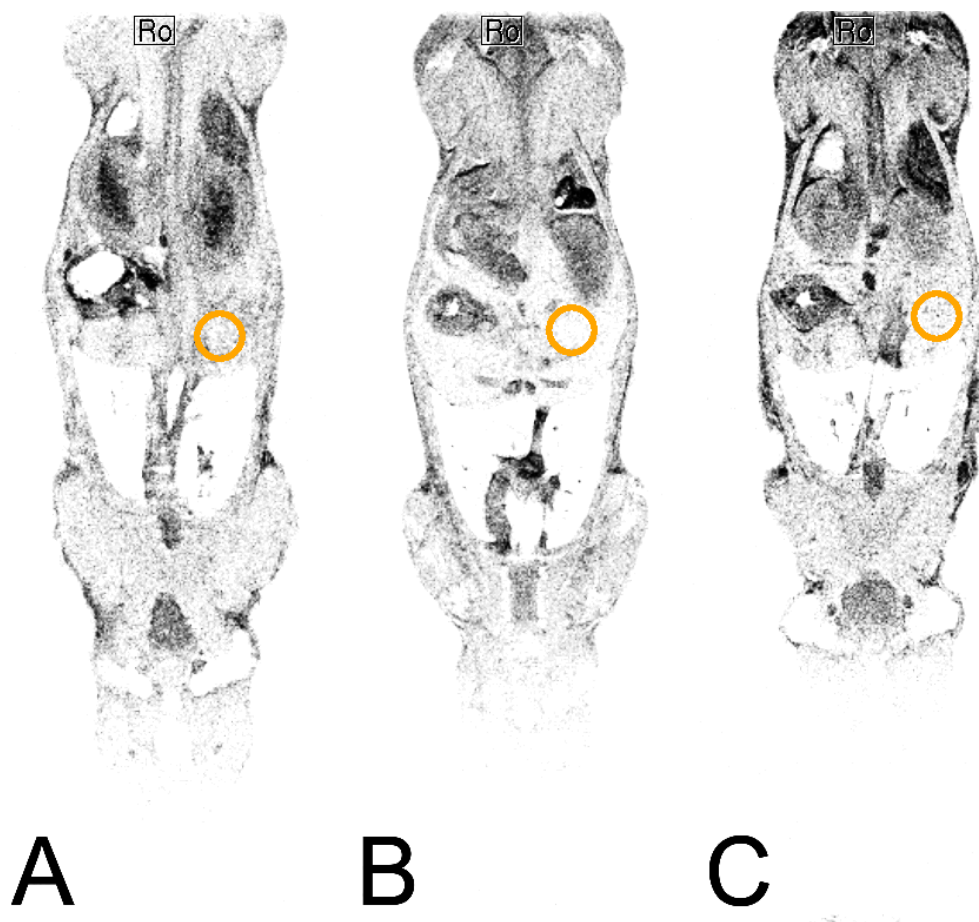

**Figure S2.** Inverted MRI Images (RARE)  
A –control mice, B- doped with Eu NPs, C- pure iron oxide NPs

**Table S1.** Results of contrasting properties estimate.

|                             | Europium NPs | Pure Iron oxide NPs | control |
|-----------------------------|--------------|---------------------|---------|
| K (FLASH, TR 300ms, TE10ms) | 4.07         | 3.49                | 1.04    |
| K (RARE, 3000ms, 40ms)      | 1.20         | 1.10                | 0.99    |

**Table S2.** Biochemical assay in mice serum. ALT, alanine aminotransferase; AST, aspartate aminotransferase; BIL, bilirubin; CT creatinine; LDH, lactate dehydrogenase.

| Group   | ALT<br>(mmol/(h*L)) | AST<br>(mmol/(h*L)) | BIL<br>(mmol/L) | CT<br>(umol/L) | LDH<br>(U/L) |
|---------|---------------------|---------------------|-----------------|----------------|--------------|
| Eu      | 0.95±0.19           | 0.43±0.04           | 0.25            | 141.1          | 276±89       |
| NEu     | 1.31±0.07           | 0.62±0.02           | 3.14            | 160.5          | 276±121      |
| Control | 0.73±0.31           | 0.6±0.01            | 2.71            | 135.6          | 196±67       |
